# Supplementary material for: Potentials and pitfalls of permafrost active layer monitoring using the HVSR method: a case study in Svalbard
Source: Copernicus journal article supplement (doi:10.5194/esurf-7-1-2019), 2019-01-10
Supplement: Supplementary file [file esurf-7-1-2019-supplement-title-page.pdf › esurf-7-1-2019-supplement-title-page.pdf]

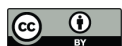

## *Supplement of*

# **Potentials and pitfalls of permafrost active layer monitoring using the HVSR method: a case study in Svalbard**

**Andreas Köhler and Christian Weidle**

*Correspondence to:* Andreas Köhler ([andreas.kohler@geo.uio.no](mailto:andreas.kohler@geo.uio.no), [andreas.koehler.geo@gmail.com](mailto:andreas.koehler.geo@gmail.com))

- [esurf-7-1-2019-supplement-title-page.pdf](#)
- [S01\\_seismic\\_tremor\\_data\\_example.mseed](#)
- [S02\\_tremor\\_detections.txt](#)
- [S03\\_monthly\\_tremor\\_RVSRs.txt](#)

The copyright of individual parts of the supplement might differ from the CC BY 4.0 License.
